# Supplementary material for: Multiscale functional specialization of rodent jaw systems; correlated bite force adaptations at molecular, muscular, and skeletal scales
Source: Research Square preprint supplement (doi:10.21203/rs.3.rs-6890167/v1), 2025-08-20
Supplement: Supplementary file 1 [file 5204dc99a6a74fb4d7047255.xlsx]

## Sheet: S1_Myosin_Summary_Data
Species	MHC	SM		DM		TP		PT		AD		SH
		mean	sd	mean	sd	mean	sd	mean	sd	mean	sd	mean	sd
CK	IIa/IIx	2.1	1.9	4.8	5.1	7.3	2.3	6.5	4.3	100	100	88.8	5.2
	IIb	0	0	0	0	0	0	0	0	0	0	8.6	5.4
	M	94	3.8	85.7	6	82.6	4.6	79.9	8.9	0	0	0	0
	I/β	3.9	2.2	9.5	2.1	10.1	2.2	13.6	4.7	0	0	2.6	2.4
GS	IIa/IIx	0	0	0	0	2.4	4.2	5.5	0.1	98.7	2.3	74.7	7.3
	IIb	0	0	0	0	0	0	0	0	0	0	18.2	7
	M	100	0	100	0	97.6	4.2	94.5	0.1	0	0	0	0
	I/β	0	0	0	0	0	0	0	0	1.3	2.3	7.1	1.2
WC	IIa/IIx	7.9	1.6	7.4	1.1	4.4	3.8	16.1	10.9	83	10.7	76.6	14.9
	IIb	0	0	0	0	0	0	0	0	0	0	0	0
	M	51.1	3.3	41.4	12.8	40.8	16	41.2	10.8	0	0	0	0
	α	41.1	4.6	51.2	13.9	54.9	19.7	42.7	21.7	17	10.7	23.4	14.9
RT	IIa/IIx	69.9	2.3	87.1	1.7	52.5	7.9	84.5	5.4	82.6	5.3	52.4	6.6
	IIb	30.1	2.3	12.9	1.7	47.5	7.9	15.5	5.4	16.1	6.5	47.6	6.6
	M	0	0	0	0	0	0	0	0	0	0	0	0
	I/β	0	0	0	0	0	0	0	0	1.3	1.3	0	0
RS	IIa/IIx	49.4	0.6	47.4	6.4	64.2	11.1	77.4	10.5	100	0	76.7	4.2
	IIb	50.6	0.6	52.6	6.4	33.2	13.6	21.7	11.9	0	0	17.1	4.1
	M	0	0	0	0	0	0	0	0	0	0	0	0
	I/β	0	0	0	0	2.6	2.6	0.8	1.4	0	0	6.2	0.6
GP	IIa/IIx	100	0	53.8	20.4	64.7	8.1	15.4	21.7	35.1	1	45.1	5.3
	IIb	0	0	46.3	20.4	35.4	8.1	84.7	21.7	64.9	1	55	5.3
	M	0	0	0	0	0	0	0	0	0	0	0	0
	I/β	0	0	0	0	0	0	0	0	0	0	0	0

## Sheet: S2_PCSA_Specimen_Data
Taxon	IND	Side	Operator	BMASS	TADD		SM					TP					DM				PT				nZMACSA	PTMASS	PTLFIB	PTTHETA	PTLMUS	PTACSA	nPTACSA
					MASS	PCSA	MASS	LFIB	THETA	PCSA	nPCSA	MASS	LFIB	THETA	PCSA	nPCSA	MASS	LIFB	ACSA	nACSA	MASS	LFIB	ACSA	nACSA	0.0996801	0.105	0.3825	1	0.5	0.257273	0.267953
Chipmunk	2	Left	NK	112	0.415	0.96	0.14	0.43	0.244	0.298	0.31	0.1	0.25	0.611	0.309	0.322	0.07	0.69	0.0957	0.0997	0.105	0.383	0.257	0.268	0.16464	0.043	0.401	1	0.713	0.100499	0.133089
Chipmunk	3	Right	JB	112	0.262	0.755	0.1	0.131	0.44	0.429	0.568	0.034	0.244	0.69	0.101	0.134	0.085	0.645	0.124	0.165	0.043	0.401	0.1	0.133	0.225758	0.07	0.685	1	NA	0.095773	0.0850288
Chipmunk	4	Right	JB	112	0.351	1.13	0.124	0.199	0.54	0.504	0.448	0.057	0.179	0.44	0.272	0.242	0.1	0.371	0.254	0.226	0.07	0.685	0.0958	0.085	0.112114	0.2206	1.23875	1	1.872	0.1669	0.0745808
Rat	68	Left	JB	338	2.224	2.24	0.783	0.78	0.367	0.878	0.392	0.692	0.614	0.47	0.942	0.421	0.528	1.97	0.251	0.112	0.221	1.24	0.167	0.0746	0.108839	0.189	0.7742	1	1.132	0.228794	0.10384
Rat	70	Right	JB	338	2.21	2.2	0.902	0.766	0.516	0.96	0.436	0.76	0.75	0.618	0.775	0.352	0.359	1.4	0.24	0.109	0.189	0.774	0.229	0.104	0.146193	0.2264	1.2565	1	1.428	0.168869	0.0788973
Rat	71	Right	LK	338	2.219	2.14	0.691	0.47	0.4	0.752	0.351	0.825	0.692	0.625	0.907	0.424	0.477	1.43	0.313	0.146	0.226	1.26	0.169	0.0789	0.113067	0.187	1.339	1	1.344	0.130887	0.0682192
Rat	71	Left	LK	338	2.133	1.92	0.765	0.793	0.5	0.794	0.414	0.842	0.776	0.701	0.777	0.405	0.339	1.46	0.217	0.113	0.187	1.34	0.131	0.0682	0.158919	0.42	0.836	1	NA	0.470846	0.237545
Rat	57	Left	ES	338	2.85	1.98	0.98	1.05	0.645	0.698	0.352	0.83	1.36	0.511	0.498	0.251	0.62	2.02	0.315	0.159	0.42	0.836	0.471	0.238	0.234001	0.4115	0.906	1	NA	0.425674	0.2406
Rat	72	Right	ES	507	3.125	1.77	1.18	1.69	0.671	0.513	0.29	0.817	1.48	0.654	0.416	0.235	0.716	1.62	0.414	0.234	0.412	0.906	0.426	0.241	0.314869	0.685	1.047	1	NA	0.613168	0.325029
Rat	72	Left	ES	507	3.425	1.89	0.748	1.77	0.619	0.323	0.171	0.872	1.78	0.685	0.356	0.189	1.12	1.75	0.594	0.315	0.685	1.05	0.613	0.325	0.306529	0.4077	0.935	1	NA	0.408662	0.231583
Rat	56	Right	ES	NA	2.969	1.76	0.831	1.36	0.644	0.459	0.26	0.974	1.24	0.725	0.356	0.202	0.756	1.31	0.541	0.307	0.408	0.935	0.409	0.232	0.156309	0.402	1.05933	1	1.05933	0.355655	0.152601
Rat	73	Left	WC	NA	2.872	2.33	0.989	0.769	0.759	0.874	0.375	0.889	0.669	0.938	0.736	0.316	0.592	1.52	0.364	0.156	0.402	1.06	0.356	0.153	0.0997652	0.6709	1.53367	1	2.419	0.470212	0.0872812
Grey Squirrel	1	Right	JB	NA	4.624	5.39	2.62	0.898	0.659	2.16	0.401	0.926	0.301	0.692	2.22	0.412	0.407	0.709	0.537	0.0998	0.671	1.53	0.47	0.0873	0.109691	0.5973	1.27317	1	2.113	0.47662	0.0920694
Grey Squirrel	1	Left	JB	NA	4.201	5.18	2.36	0.744	0.671	2.33	0.45	0.853	0.333	0.722	1.8	0.348	0.391	0.646	0.568	0.11	0.597	1.27	0.477	0.0921	0.240939	0.71	1.099	1	1.099	0.6055	0.240622
Grey Squirrel	16	Right	RB	438	3.39	2.52	1.01	1.34	0.337	0.668	0.266	0.47	0.604	0.51	0.636	0.253	1.2	1.86	0.606	0.241	0.71	1.1	0.606	0.241	0.228373	0.77	1.074	1	1.074	0.6719	0.256509
Grey Squirrel	16	Left	RB	438	3.16	2.62	0.87	1.11	0.391	0.677	0.258	0.46	0.512	0.646	0.673	0.257	1.06	1.72	0.598	0.228	0.77	1.07	0.672	0.257	0.24554	0.66	1.165	1	1.165	0.7383	0.199562
Grey Squirrel	X	Right	RB	618	4.48	3.7	1.46	0.956	0.529	1.24	0.334	0.77	0.8	0.436	0.818	0.221	1.59	1.64	0.908	0.246	0.66	1.17	0.738	0.2	0.271564	0.63	1.185	1	1.185	0.8047	0.21855
Grey Squirrel	X	Left	RB	618	4.47	3.68	1.41	1.32	0.396	0.925	0.251	0.75	0.68	0.4	0.952	0.259	1.68	1.57	1	0.272	0.63	1.19	0.805	0.219	0.445734	0.2937	1.28267	1	1.28267	0.214598	0.115307
Red Squirrel	1	Right	WC	NA	1.972	1.86	0.374	1.03	0.265	0.329	0.177	0.488	0.817	0.513	0.488	0.262	0.816	0.922	0.83	0.446	0.294	1.28	0.215	0.115	0.492142	0.2422	0.727667	1	0.727667	0.311944	0.147697
Red Squirrel	3	Right	WC	NA	2.272	2.11	0.409	1.4	0.237	0.266	0.126	0.481	0.8	0.498	0.495	0.234	1.14	1.03	1.04	0.492	0.242	0.728	0.312	0.148	0.190638	0.304	0.935	1	0.935	0.304718	0.190042
Red Squirrel	8	Left	NK	172	1.782	1.6	0.357	0.754	0.587	0.369	0.23	0.379	0.532	0.364	0.624	0.389	0.742	2.28	0.306	0.191	0.304	0.935	0.305	0.19	0.219111	0.28	0.945	1	0.945	0.277691	0.189139
Red Squirrel	8	Right	NK	172	1.68	1.47	0.338	0.782	0.491	0.357	0.243	0.312	0.537	0.352	0.511	0.348	0.75	2.19	0.322	0.219	0.28	0.945	0.278	0.189	0.215951	2.1142	0.94256	1	0.94256	2.10219	0.270962
Woodchuck	1	right	ES	NA	12.54	7.76	3.92	1.36	0.437	2.44	0.315	2.72	1.19	0.768	1.54	0.198	3.79	2.12	1.68	0.216	2.11	0.943	2.1	0.271	0.111943	1.6	1.36467	1	1.36467	1.09883	0.139555
Woodchuck	2	Right	WC	1700	13.1	7.87	4.72	0.985	0.633	3.62	0.459	4.67	1.8	0.361	2.28	0.289	2.11	2.25	0.881	0.112	1.6	1.36	1.1	0.14	0.181943	1.8	1.3872	1	1.3872	1.2161	0.171792
Woodchuck	2	Left	WC	1700	13.74	7.08	5.15	1.7	0.318	2.7	0.382	4.26	1.91	0.462	1.87	0.264	2.53	1.84	1.29	0.182	1.8	1.39	1.22	0.172	0.21855	1.718	1.4998	1	1.4998	1.07356	0.152159
Woodchuck	3	Right	WC	1340	13.49	7.06	4.12	1.6	0.232	2.36	0.334	4.52	1.86	0.418	2.08	0.295	3.13	1.9	1.54	0.219	1.72	1.5	1.07	0.152	0.246363	1.618	1.4543	1	1.4543	1.0427	0.150277
Woodchuck	3	Left	WC	1340	13.8	6.94	4.29	1.76	0.261	2.21	0.318	4.42	1.95	0.376	1.98	0.285	3.47	1.9	1.71	0.246	1.62	1.45	1.04	0.15	0.138183	1.08	1.625	1	1.85	0.622882	0.136183
Guinea pig	1	Right	NK	961	6.82	4.57	3.05	1.16	0.537	2.13	0.465	1.61	1.11	0.498	1.19	0.261	1.08	1.6	0.632	0.138	1.08	1.63	0.623	0.136	0.156675	1.039	2	1	2	0.486879	0.105277
Guinea pig	1	Left	NK	961	6.84	4.62	3.13	1.02	0.593	2.4	0.518	1.43	1.19	0.444	1.02	0.22	1.24	1.6	0.725	0.157	1.04	2	0.487	0.105	0.255709	1.24	1.15	1	1.605	1.01055	0.198718
Guinea pig	2	Right	NK	901	7.89	5.09	2.8	1.5	0.494	1.54	0.303	1.63	1.1	0.476	1.23	0.243	2.22	1.6	1.3	0.256	1.24	1.15	1.01	0.199	0.308972	1.3	1.2	1	1.655	1.01531	0.218016
Guinea pig	2	Left	NK	901	7.57	4.66	2.28	1.6	0.595	1.11	0.237	1.38	1.1	0.368	1.1	0.236	2.61	1.7	1.44	0.309	1.3	1.2	1.02	0.218

## Sheet: S3_XROMM_Specimens
Specimen	Species	Volume (mm3)	Incisor (mm)	Premolar (mm)	Molar (mm)
CK12	Chipmunk	180	25.85	16.17	10.37
GP03	Guinea pig	1821.7	46.6	27.56	12.43
GP04	Guinea pig	1636	45.8	26.8	11.7
GP05	Guinea pig	1702	44.5	26.2	11
RS07	Red Squirrel	300	29.43	19.01	12.72
RT02	Rat	410	31.3	18.4	12.65
RT05	Rat	429	32.76	19.73	12.8
RT64	Rat	361	31.29	19.09	12.34
SQ03	Grey Squirrel	847	41.84	25.88	15.79
SQ04	Grey Squirrel	875	41.16	25.5	15.53
WC02	Woodchuck	4510	65.01	39.13	23.12
WC03	Woodchuck	4438	64.63	40.32	23.64
